# Supplementary material
Source: PubMed Central journal article supplement (PMC2957840)
Supplement: NIHMS238368-supplement-Supplement.pdf [file NIHMS238368-supplement-Supplement.pdf]

## **SUPPLEMENTAL MATERIAL**

### **Supplemental Methods**

#### ***IBC Genotyping and Quality Control***

DNA was isolated from peripheral blood mononuclear cells in all subjects and DNA quality was assessed utilizing optical absorbance and minigels. DNA was amplified and hybridized with IBC arrays using the Illumina platform according to manufacturer specifications. Details regarding chip design have been published<sup>1</sup> and a list of genes and SNPs on the array is available at <http://bmic.upenn.edu/cvdsnp>. Because this was a new platform, we utilized a set of 5051 samples from multiple different IBC studies to derive a customized cluster file for genotype calling using BeadStudio™ software. We checked for consistency in genotyping within each of 6 duplicate sample pairs, and the genotype concordance rate was > 99.99%. The overall genotype call rate across all samples was 99.6%.

We then performed quality control measures to exclude unreliable samples. First, samples were excluded if the genotype call rate was < 97.5% or if the sample showed excess or deficient heterozygosity (inbreeding coefficient  $|F| > 0.1$ ). Next, we assessed for cryptic relatedness or erroneous duplicates among participants using identical by descent estimation. We also compared all IBC genotype in the Stage 1 Discovery population with similar data from populations of different ancestries and used multi-dimensional scaling (MDS) analysis to determine subjects that shared similar genetic ancestry (Supplemental Figure 1). We used this information to exclude those subjects with genetically inferred non-Caucasian ancestry from the Stage 1 analysis.

We performed quality control measures to exclude unreliable SNPs. For the analysis reported here, we eliminated SNPs with genotype call rate < 95%, with minor allele frequency (MAF) < 1% in either cases or controls or if there was significant departure from Hardy-Weinberg equilibrium ( $p < 10^{-6}$ ).

6). This resulted in 31,682 autosomal SNPs in our final analysis in the Stage 1 Discovery Population. See Supplemental Table 5 for Hardy-Weinberg equilibrium p-values for reported SNPs.

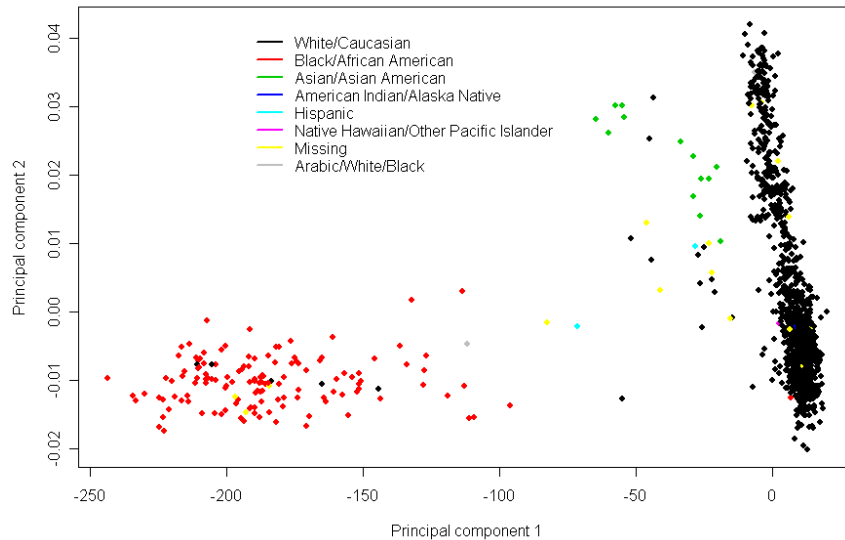

**Supplemental Figure 1.** MDS analysis of genetic race using all IBC genotypes. Self-identified race is indicated by color. We limited our IBC analysis to genetically inferred Caucasian Race.

### *Analysis of IBC array Data*

Our primary analysis compared genotype frequencies in cases of all-cause heart failure with frequencies in controls adjusting for age, gender, study site and the first two principal components from the MDS analysis to avoid confounding by residual differences in ancestry within our Stage 1 discovery cohort of genetically-inferred Caucasians. All analyses were conducted using PLINK software<sup>2</sup>. After association analysis was conducted, we compared the observed p-value distribution with that expected under the null distribution that assumes no association, no population stratification, and genotyping bias, and calculated the genomic control inflation factor  $\lambda$ , defined as the median of the observed 1-df chi-squared statistics divided by 0.455 (Supplemental Figure 2)<sup>3</sup>. Secondary Analyses were conducted in an analogous fashion with additional adjustment for history of hypertension and history of diabetes mellitus.

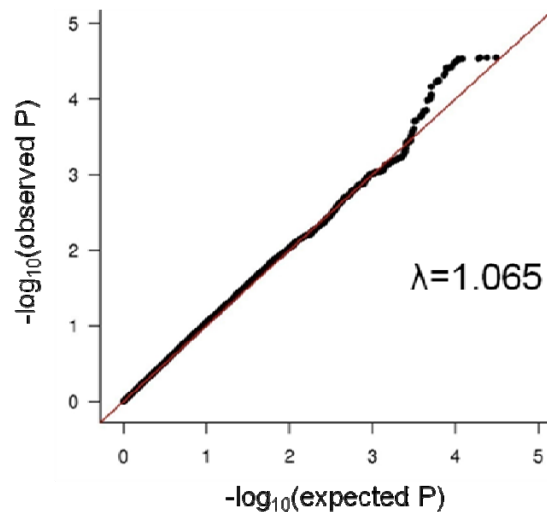

**Supplemental Figure 2.** QQ- plot for IBC Analysis in the Caucasian Discovery Cohort.

***Power Calculations:***

We estimated power using genetic power calculator (<http://pngu.mgh.harvard.edu/~purcell/gpc/>). Based on a Stage 1 sample size of 1,590 cases and 577 controls and  $\alpha = 5 \times 10^{-5}$ , we estimate 80% power detect a OR of 1.36 or greater for a risk allele (and 80% power to detect an OR of 0.74 or less for a protective allele) for a variant with minor allele frequency of 0.40. Based on a combined Stage 1 and Stage 2 samples size of 1899 cases and 2891 controls and  $\alpha = 5 \times 10^{-5}$ , we estimate 80% power detect an OR of 1.20 or greater for a risk allele (and 80% power to detect an OR of 0.84 or less for a protective allele) for a variant with minor allele frequency of 0.40.

***Imputation of Genotypes at Associated Loci***

To better understand our two replicated SNPs associated with heart failure in Caucasians, we increased genotype coverage at these loci by imputing IBC genotypes with HapMap CEU data. We

conducted imputations using a computationally efficient hidden Markov model based algorithm as implemented in software MACH.<sup>4</sup>

MACH combines our genotyped data with phased chromosomes from the HapMap CEU samples and then infers the unknown genotypes in the study sample probabilistically by searching for similar stretches of flanking haplotype in the HapMap CEU reference sample. In the imputation procedure, we used the genotype data from the 31,682 IBC SNPs that passed quality control. We only analyzed SNPs that passed the following imputation QC criteria:  $R^2 > 0.3$ , information content  $> 0.5$ , and MAF  $> 0.01$  in both cases and controls. Since there is uncertainty involved in the imputation, to take into account of imputation ambiguity, we analyzed case-control associations for imputed SNPs using software SNPTEST<sup>5</sup>. We then constructed association plots and LD plots at rs1739843 and rs6787362 using SNAP<sup>6</sup>.

### ***Comparison of Top Framingham heart failure SNPs with IBC proxies***

We selected SNPs associated with incident heart failure from Larson et al<sup>7</sup> and utilized SNAP to identify proxies on the IBC array within 500 kb of these SNPs (Supplemental Table 6). Proxy SNPs at *C9orf39* and at *RYR2* were present on the IBC array within 500 kb of the Framingham hits, but with variable LD based on HapMap data. We then compared association P-values for these proxies identified in our primary analysis (which included adjustment for age, sex, site, and principal components from MDS). Proxies at *C9orf39* showed no association with heart failure, but several SNPs at *RYR2* showed modest associations in our data.

**Supplemental Table 1. Top Associations with All-Cause Heart Failure in the Stage 1 Caucasian Discovery Population using the IBC array.\***

| Gene              | Chr | Top SNP           | Coordinate      | Variant Type | Primary Analysis |                          | Secondary Analysis |                   | Minor Allele | Major Allele | Minor Allele Frequencies |          | Number of associated IBC SNPs |
|-------------------|-----|-------------------|-----------------|--------------|------------------|--------------------------|--------------------|-------------------|--------------|--------------|--------------------------|----------|-------------------------------|
|                   |     |                   |                 |              | P-value          | OR (95%CI)               | P-value            | OR (95%CI)        |              |              | Cases                    | Controls |                               |
| <i>HSPB7</i>      | 1   | <b>rs1739843</b>  | <b>16215841</b> | Intronic     | <b>2.83E-05</b>  | <b>0.75 (0.65, 0.85)</b> | 7.66E-06           | 0.71 (0.62, 0.83) | A            | G            | 0.367                    | 0.436    | 1                             |
| <i>FRMD4B</i>     | 3   | <b>rs6787362</b>  | <b>69310069</b> | Intronic     | <b>4.51E-05</b>  | <b>0.65 (0.53, 0.80)</b> | 3.38E-04           | 0.67 (0.53, 0.83) | G            | A            | 0.098                    | 0.140    | 1                             |
| <i>PCSK6</i>      | 15  | <b>rs7174882</b>  | <b>99836368</b> | Intronic     | <b>5.70E-05</b>  | <b>0.76 (0.66, 0.87)</b> | 5.74E-04           | 0.78 (0.67, 0.89) | C            | A            | 0.449                    | 0.511    | 2                             |
| <i>PDE4D</i>      | 5   | <b>rs16877169</b> | <b>58813004</b> | Intronic     | <b>5.90E-05</b>  | <b>0.63 (0.51, 0.79)</b> | 4.74E-04           | 0.65 (0.52, 0.83) | A            | C            | 0.075                    | 0.119    | 4                             |
| <i>ARHGAP26</i>   | 5   | rs17099475        | 142138783       | Intronic     | 1.41E-04         | 1.64 (1.27, 2.11)        | 2.28E-05           | 1.77 (1.36, 2.31) | G            | A            | 0.109                    | 0.071    | 1                             |
| <i>GAS7</i>       | 17  | rs16959235        | 9862480         | Intronic     | 1.60E-04         | 0.65 (0.52, 0.81)        | 2.96E-04           | 0.65 (0.52, 0.81) | A            | G            | 0.079                    | 0.115    | 1                             |
| <i>SORCS1</i>     | 10  | rs12360161        | 108592969       | Intronic     | 1.71E-04         | 0.55 (0.40, 0.75)        | 4.62E-04           | 0.55 (0.40, 0.75) | C            | A            | 0.035                    | 0.062    | 1                             |
| <i>CASP8</i>      | 2   | rs6435072         | 201824041       | Intronic     | 1.97E-04         | 0.67 (0.55, 0.83)        | 1.18E-03           | 0.67 (0.55, 0.83) | A            | C            | 0.102                    | 0.141    | 2                             |
| <i>RNF216</i>     | 7   | rs12668000        | 5796948         | Intergenic   | 2.65E-04         | 0.76 (0.66, 0.88)        | 7.53E-04           | 0.76 (0.66, 0.88) | G            | C            | 0.311                    | 0.371    | 1                             |
| <i>FAM174A</i>    | 5   | rs12514622        | 100022279       | Intergenic   | 4.48E-04         | 0.78 (0.67, 0.89)        | 7.72E-04           | 0.78 (0.67, 0.89) | A            | G            | 0.298                    | 0.354    | 1                             |
| <i>AL359649.8</i> | 13  | rs1183183         | 110934706       | Intergenic   | 4.94E-04         | 0.75 (0.64, 0.88)        | 3.12E-04           | 0.75 (0.64, 0.88) | A            | C            | 0.197                    | 0.248    | 1                             |
| <i>MMP3</i>       | 11  | rs520540          | 102214635       | Coding S     | 5.00E-04         | 0.79 (0.69, 0.90)        | 2.57E-03           | 0.79 (0.69, 0.90) | A            | G            | 0.485                    | 0.541    | 2                             |
| <i>NOS1AP</i>     | 1   | rs10918594        | 160297312       | Intergenic   | 5.94E-04         | 0.78 (0.67, 0.90)        | 1.12E-02           | 0.78 (0.67, 0.90) | C            | G            | 0.304                    | 0.366    | 2                             |
| <i>LIF</i>        | 22  | rs715605          | 28970308        | Intronic     | 6.01E-04         | 0.68 (0.55, 0.85)        | 5.20E-05           | 0.68 (0.55, 0.85) | G            | A            | 0.086                    | 0.123    | 1                             |
| <i>POLR2A</i>     | 17  | rs2269459         | 7353762         | Intronic     | 6.58E-04         | 0.77 (0.66, 0.89)        | 2.95E-03           | 0.77 (0.66, 0.89) | A            | G            | 0.247                    | 0.297    | 1                             |
| <i>CACNA1C</i>    | 12  | rs16929388        | 2405678         | Intronic     | 7.49E-04         | 1.72 (1.25, 2.36)        | 4.70E-03           | 1.61 (1.16, 2.24) | G            | A            | 0.075                    | 0.044    | 1                             |
| <i>ITGB4</i>      | 17  | rs3862481         | 71232322        | Intronic     | 7.59E-04         | 0.74 (0.61, 0.88)        | 2.82E-04           | 0.77 (0.66, 0.90) | A            | G            | 0.144                    | 0.185    | 1                             |
| <i>NTRK2</i>      | 9   | rs1443439         | 86712230        | Intronic     | 8.80E-04         | 0.53 (0.37, 0.78)        | 2.80E-03           | 0.73 (0.62, 0.87) | A            | C            | 0.025                    | 0.043    | 1                             |
| <i>PRKAG2</i>     | 7   | rs2727537         | 151003979       | Intronic     | 9.08E-04         | 0.79 (0.68, 0.91)        | 1.39E-03           | 0.80 (0.69, 0.93) | G            | A            | 0.344                    | 0.400    | 1                             |
| <i>MMP13</i>      | 11  | rs562736          | 102332123       | Upstream     | 9.15E-04         | 1.27 (1.10, 1.46)        | 3.26E-03           | 1.25 (1.08, 1.45) | A            | T            | 0.455                    | 0.402    | 2                             |
| <i>ADRA1A</i>     | 8   | rs12541572        | 26764903        | Intronic Reg | 9.28E-04         | 1.45 (1.16, 1.81)        | 6.25E-04           | 1.50 (1.19, 1.89) | A            | G            | 0.140                    | 0.100    | 1                             |
| <i>F13A1</i>      | 6   | rs1742932         | 6249530         | Intronic     | 9.74E-04         | 1.30 (1.11, 1.51)        | 1.54E-04           | 1.37 (1.16, 1.61) | G            | A            | 0.306                    | 0.253    | 1                             |

\*For each gene data for the most strongly associated SNP is summarized. OR are for the minor allele. The primary analysis is adjusted for age, sex, study site, and MDS. The secondary analysis is additionally adjusted for history of diabetes and hypertension. SNPs selected for Stage 2 are in bold.

**Supplemental Table 2. Top Associations with Heart Failure Subtypes in the Stage 1 Caucasian Discovery Population using the IBC array.\***

| Gene                             | Chr       | Top SNP          | Coordinate      | Variant Type    | Primary Analysis |                          | Secondary Analysis |                   | Minor Allele | Major Allele | Minor Allele Frequencies |          | Number of associated IBC SNPs |
|----------------------------------|-----------|------------------|-----------------|-----------------|------------------|--------------------------|--------------------|-------------------|--------------|--------------|--------------------------|----------|-------------------------------|
|                                  |           |                  |                 |                 | P-value          | OR (95%CI)               | P-value            | OR (95%CI)        |              |              | Cases                    | Controls |                               |
| <b>Ischemic Heart Failure</b>    |           |                  |                 |                 |                  |                          |                    |                   |              |              |                          |          |                               |
| <b>PCSK6</b>                     | <b>15</b> | <b>rs7174882</b> | <b>99836368</b> | <b>Intronic</b> | <b>1.56E-05</b>  | <b>0.70 (0.60, 0.83)</b> | 5.70E-05           | 0.69 (0.57, 0.83) | C            | A            | 0.432                    | 0.511    | 2                             |
| <i>F2RL1</i>                     | 5         | rs2243073        | 76151489        | Intronic        | 1.69E-04         | 1.73 (1.30, 2.30)        | 3.83E-04           | 1.79 (1.30, 2.46) | A            | T            | 0.111                    | 0.072    | 1                             |
| <i>AL445929.5</i>                | 13        | rs9544230        | 75717997        | Intergenic      | 1.83E-04         | 1.43 (1.18, 1.72)        | 1.66E-04           | 1.50 (1.22, 1.85) | A            | G            | 0.290                    | 0.227    | 1                             |
| <i>PDE4D</i>                     | 5         | rs16877169       | 58813004        | Intronic        | 2.16E-04         | 0.60 (0.46, 0.79)        | 1.55E-03           | 0.61 (0.44, 0.83) | A            | C            | 0.070                    | 0.119    | 1                             |
| <i>TRBV2</i>                     | 7         | rs11764352       | 141644584       | Intronic        | 3.63E-04         | 0.72 (0.60, 0.86)        | 2.26E-03           | 0.73 (0.60, 0.89) | A            | T            | 0.258                    | 0.321    | 1                             |
| <i>EVC</i>                       | 4         | rs7674034        | 5793954         | Intronic        | 4.21E-04         | 0.73 (0.61, 0.87)        | 4.75E-04           | 0.70 (0.58, 0.85) | G            | A            | 0.299                    | 0.360    | 1                             |
| <i>F7</i>                        | 13        | rs6041           | 112820708       | Intronic        | 7.41E-04         | 0.65 (0.51, 0.83)        | 1.23E-02           | 0.70 (0.53, 0.93) | A            | G            | 0.108                    | 0.140    | 3                             |
| <i>STAT3</i>                     | 17        | rs2306580        | 37745206        | Intronic        | 9.83E-04         | 1.73 (1.25, 2.40)        | 3.28E-03           | 1.73 (1.20, 2.50) | G            | C            | 0.091                    | 0.053    | 1                             |
| <b>Nonischemic Heart Failure</b> |           |                  |                 |                 |                  |                          |                    |                   |              |              |                          |          |                               |
| <i>LIPC</i>                      | 15        | rs4581654        | 56600858        | Intronic        | 4.85E-05         | 1.50 (1.23, 1.82)        | 2.78E-04           | 1.46 (1.19, 1.78) | A            | C            | 0.264                    | 0.199    | 3                             |
| <i>HSPB7</i>                     | 1         | rs1739843        | 16215841        | Intronic        | 1.46E-04         | 0.73 (0.62, 0.85)        | 1.50E-04           | 0.72 (0.61, 0.85) | A            | G            | 0.358                    | 0.436    | 1                             |
| <i>LIF</i>                       | 22        | rs715605         | 28970308        | Intronic        | 1.75E-04         | 0.59 (0.45, 0.78)        | 2.21E-04           | 0.58 (0.44, 0.78) | G            | A            | 0.076                    | 0.123    | 1                             |
| <i>ABO</i>                       | 9         | rs8176694        | 135127467       | Intronic        | 2.02E-04         | 1.49 (1.21, 1.85)        | 7.37E-04           | 1.46 (1.17, 1.82) | G            | A            | 0.219                    | 0.163    | 2                             |
| <i>GPX2</i>                      | 14        | rs2737844        | 64478262        | Intronic        | 3.09E-04         | 0.72 (0.61, 0.86)        | 1.64E-03           | 0.75 (0.62, 0.89) | A            | G            | 0.255                    | 0.320    | 2                             |
| <i>TNFSF4</i>                    | 1         | rs1234313        | 171432870       | Intronic        | 5.56E-04         | 1.37 (1.14, 1.64)        | 1.67E-03           | 1.35 (1.12, 1.63) | A            | G            | 0.335                    | 0.266    | 1                             |
| <i>ADRA1A</i>                    | 8         | rs12541572       | 26764903        | Intronic Reg    | 6.10E-04         | 1.55 (1.21, 1.98)        | 5.58E-04           | 1.58 (1.22, 2.05) | A            | G            | 0.148                    | 0.100    | 1                             |
| <i>IGF1R</i>                     | 15        | rs1546713        | 97289389        | Intronic        | 6.61E-04         | 0.74 (0.62, 0.88)        | 1.47E-03           | 0.74 (0.62, 0.89) | A            | G            | 0.289                    | 0.352    | 1                             |
| <i>RYR2</i>                      | 1         | rs2618717        | 235798955       | Intronic        | 8.30E-04         | 1.36 (1.13, 1.62)        | 5.62E-04           | 1.39 (1.15, 1.67) | G            | A            | 0.320                    | 0.261    | 1                             |
| <i>CALU</i>                      | 7         | rs4731513        | 128167231       | Intronic        | 8.90E-04         | 0.75 (0.63, 0.88)        | 1.77E-03           | 0.75 (0.63, 0.90) | G            | A            | 0.330                    | 0.393    | 1                             |
| <i>ATP6V1B1</i>                  | 2         | rs2239484        | 71026916        | Intronic        | 9.13E-04         | 1.58 (1.21, 2.07)        | 3.81E-04           | 1.67 (1.26, 2.21) | G            | A            | 0.130                    | 0.086    | 1                             |
| <i>ANGPT2</i>                    | 8         | rs11989215       | 6383317         | Intronic        | 9.42E-04         | 1.33 (1.12, 1.58)        | 2.31E-04           | 1.40 (1.17, 1.68) | G            | A            | 0.368                    | 0.300    | 1                             |
| <i>POLR2A</i>                    | 17        | rs2269459        | 7353762         | Intronic        | 9.60E-04         | 0.74 (0.61, 0.88)        | 2.20E-03           | 0.74 (0.61, 0.90) | A            | G            | 0.236                    | 0.297    | 1                             |

\*For each gene data for the most strongly associated SNP is summarized. Odds Ratios are for the minor allele. The primary analysis is adjusted for age, sex, study site, and MDS. The secondary analysis is additionally adjusted for history of diabetes and hypertension. SNPs selected for Stage 2 are in bold.

**Supplemental Table 3. Associations in African Americans**

| Gene          | Chr | SNP        | SNP type | Minor/Major<br>allele | HapMap<br>YRI MAF | Control<br>MAF | Case<br>MAF | OR                | P-value |
|---------------|-----|------------|----------|-----------------------|-------------------|----------------|-------------|-------------------|---------|
| <i>HSPB7</i>  | 1   | rs1739843  | Intronic | A/G                   | 0.23              | 0.281          | 0.300       | 1.09 (0.92, 1.29) | 0.34    |
| <i>FRMD4B</i> | 3   | rs6787362  | Intronic | G/A                   | 0.093             | 0.099          | 0.083       | 0.83 (0.64, 1.10) | 0.19    |
| <i>PCSK6</i>  | 15  | rs7174882  | Intronic | C/A                   | 0.422             | 0.452          | 0.474       | 1.09 (0.93, 1.28) | 0.29    |
| <i>PDE4D</i>  | 5   | rs16877169 | Intronic | A/C                   | 0.441             | 0.339          | 0.304       | 0.84 (0.72, 0.99) | 0.039   |

\*N= 635 cases, 714 controls. OR is for the minor allele, adjusted for age, sex, and study site.

**Supplemental Table 4. Analysis of subgroups and intermediate phenotypes in African Americans**

| Gene         | SNP        | Subgroup    | OR                | P     | OR <sub>DM, HTN</sub> | P <sub>DM, HTN</sub> |
|--------------|------------|-------------|-------------------|-------|-----------------------|----------------------|
| <i>PDE4D</i> | rs16877169 | All         | 0.84 (0.72, 0.99) | 0.039 | 0.84 (0.69, 1.02)     | .07                  |
|              |            | Ischemic    | 0.92 (0.74, 1.13) | 0.43  | 0.91 (0.72, 1.15)     | .43                  |
|              |            | Nonischemic | 0.78 (0.63, 0.95) | .015  | 0.77 (0.63, 1.00)     | .054                 |

n = 635 cases (300 ischemic, 324 nonischemic, 11 other) and 714 controls.

OR is for the minor allele, adjusted for age, sex, and study site. OR<sub>DM, HTN</sub> is additionally adjusted for history of diabetes and hypertension



**Supplemental Table 5.**

| Gene          | SNP               | HWE P-values          |                       |                      |
|---------------|-------------------|-----------------------|-----------------------|----------------------|
|               |                   | Stage 1<br>Caucasians | Stage 2<br>Caucasians | African<br>Americans |
| <b>HSPB7</b>  | <b>rs1739843</b>  | <b>0.47</b>           | <b>0.57</b>           | <b>0.92</b>          |
| <b>FRMD4B</b> | <b>rs6787362</b>  | <b>0.66</b>           | <b>0.77</b>           | <b>0.30</b>          |
| <b>PCSK6</b>  | <b>rs7174882</b>  | <b>0.11</b>           | <b>0.91</b>           | <b>0.37</b>          |
| <b>PDE4D</b>  | <b>rs16877169</b> | <b>0.14</b>           | <b>0.54</b>           | <b>0.19</b>          |
| ABO           | rs8176694         | 0.73                  | -                     | -                    |
| ADRA1A        | rs12541572        | 0.70                  | -                     | -                    |
| AL359649.8    | rs1183183         | 0.08                  | -                     | -                    |
| AL445929.5    | rs9544230         | 0.31                  | -                     | -                    |
| ANGPT2        | rs11989215        | 0.96                  | -                     | -                    |
| ARHGAP26      | rs17099475        | 0.63                  | -                     | -                    |
| ATP6V1B1      | rs2239484         | 0.91                  | -                     | -                    |
| CACNA1C       | rs16929388        | 0.49                  | -                     | -                    |
| CALU          | rs4731513         | 0.06                  | -                     | -                    |
| CASP8         | rs6435072         | 0.08                  | -                     | -                    |
| EVC           | rs7674034         | 0.38                  | -                     | -                    |
| F13A1         | rs1742932         | 0.47                  | -                     | -                    |
| F2RL1         | rs2243073         | 0.05                  | -                     | -                    |
| F7            | rs6041            | 0.42                  | -                     | -                    |
| FAM174A       | rs12514622        | 0.16                  | -                     | -                    |
| GAS7          | rs16959235        | 0.42                  | -                     | -                    |
| GPX2          | rs2737844         | 0.79                  | -                     | -                    |
| IGF1R         | rs1546713         | 0.49                  | -                     | -                    |
| ITGB4         | rs3862481         | 0.57                  | -                     | -                    |
| LIF           | rs715605          | 1.0                   | -                     | -                    |
| LIPC          | rs4581654         | 0.61                  | -                     | -                    |
| MMP13         | rs562736          | 0.32                  | -                     | -                    |
| MMP3          | rs520540          | 0.79                  | -                     | -                    |
| NOS1AP        | rs10918594        | 0.84                  | -                     | -                    |
| NTRK2         | rs1443439         | 1.0                   | -                     | -                    |
| POLR2A        | rs2269459         | 0.91                  | -                     | -                    |
| POLR2A        | rs2269459         | 0.91                  | -                     | -                    |
| PRKAG2        | rs2727537         | 0.61                  | -                     | -                    |
| RNF216        | rs12668000        | 0.53                  | -                     | -                    |
| RYR2          | rs2618717         | 0.79                  | -                     | -                    |
| SORCS1        | rs12360161        | 1.0                   | -                     | -                    |
| STAT3         | rs2306580         | 0.63                  | -                     | -                    |
| TNFSF4        | rs1234313         | 0.54                  | -                     | -                    |
| TRBV2         | rs11764352        | 0.79                  | -                     | -                    |

**Supplemental Table 6. Comparison with Published Framingham 100K Heart Failure GWAS Findings**

| SNP        | Chr | Location  | Nearest Gene    | Framingham Association Method | Framingham P-value | IBC proxies (< 500 kB) | Distance (kB) | R <sup>2</sup> | IBC P-values            |                        |                           |
|------------|-----|-----------|-----------------|-------------------------------|--------------------|------------------------|---------------|----------------|-------------------------|------------------------|---------------------------|
|            |     |           |                 |                               |                    |                        |               |                | All Cause Heart Failure | Ischemic Heart Failure | Nonischemic Heart Failure |
| rs740363   | 10  | 118565596 | <i>KIAA1598</i> | FBAT                          | 8.82E-06           | rs992528               | 413           | 0.016          | -                       | -                      | -                         |
| rs10511633 | 9   | 17151527  | <i>C9orf39</i>  | FBAT                          | 2.59E-05           | rs1442526              | 234           | 0.712          | 0.45                    | 0.67                   | 0.38                      |
|            |     |           |                 |                               |                    | rs2499053              | 326           | 0.34           | 0.43                    | 0.90                   | 0.12                      |
|            |     |           |                 |                               |                    | rs2499054              | 326           | 0.274          | 0.86                    | 0.76                   | 0.50                      |
|            |     |           |                 |                               |                    | rs10963034             | 162           | 0.036          | 0.45                    | 0.82                   | 0.33                      |
|            |     |           |                 |                               |                    | rs10963045             | 181           | 0.036          | 0.45                    | 0.93                   | 0.35                      |
| rs10515869 | 5   | 163444804 | -               | GEE                           | 4.72E-05           | none                   | -             | -              | -                       | -                      | -                         |
| rs1176486  | 10  | 132315529 | -               | GEE                           | 1.49E-04           | none                   | -             | -              | -                       | -                      | -                         |
| rs9313999  | 5   | 163444569 | -               | GEE                           | 1.55E-04           | none                   | -             | -              | -                       | -                      | -                         |
| rs939698   | 1   | 235857303 | <i>RYR2</i>     | GEE                           | 3.60E-04           | rs663152               | 2             | 1              | 0.161                   | 0.095                  | 0.48                      |
|            |     |           |                 |                               |                    | rs1759123              | 3             | 0.194          | 0.015                   | 0.014                  | 0.046                     |
|            |     |           |                 |                               |                    | rs2618717              | 58            | 0.007          | 0.016                   | 0.560                  | 0.0008                    |
|            |     |           |                 |                               |                    | rs6663810              | 372           | 0.001          | 0.060                   | 0.006                  | 0.47                      |

## References

- (1) Keating BJ, Tischfield S, Murray SS, Bhangale T, Price TS, Glessner JT, Galver L, Barrett JC, Grant SF, Farlow DN, Chandrupatla HR, Hansen M, Ajmal S, Papanicolaou GJ, Guo Y, Li M, Derohannessian S, de Bakker PI, Bailey SD, Montpetit A, Edmondson AC, Taylor K, Gai X, Wang SS, Fornage M, Shaikh T, Groop L, Boehnke M, Hall AS, Hattersley AT, Frackelton E, Patterson N, Chiang CW, Kim CE, Fabsitz RR, Ouwehand W, Price AL, Munroe P, Caulfield M, Drake T, Boerwinkle E, Reich D, Whitehead AS, Cappola TP, Samani NJ, Lusk AJ, Schadt E, Wilson JG, Koenig W, McCarthy MI, Kathiresan S, Gabriel SB, Hakonarson H, Anand SS, Reilly M, Engert JC, Nickerson DA, Rader DJ, Hirschhorn JN, Fitzgerald GA. Concept, design and implementation of a cardiovascular gene-centric 50 k SNP array for large-scale genomic association studies. *PLoS ONE* 2008;3(10):e3583.
- (2) Purcell S, Neale B, Todd-Brown K, Thomas L, Ferreira MA, Bender D, Maller J, Sklar P, de Bakker PI, Daly MJ, Sham PC. PLINK: a tool set for whole-genome association and population-based linkage analyses. *Am J Hum Genet* 2007 September;81(3):559-75.
- (3) Devlin B, Roeder K. Genomic control for association studies. *Biometrics* 1999 December;55(4):997-1004.
- (4) Li Y, Abecasis GR. Mach 1.0: Rapid Haplotype Reconstruction and Missing Genotype Inference. *Am J Hum Genet* 2006 March;S79(3):2290.
- (5) Marchini J, Howie B, Myers S, McVean G, Donnelly P. A new multipoint method for genome-wide association studies by imputation of genotypes. *Nat Genet* 2007 July;39(7):906-13.
- (6) Johnson AD, Handsaker RE, Pulit SL, Nizzari MM, O'Donnell CJ, de Bakker PI. SNAP: a web-based tool for identification and annotation of proxy SNPs using HapMap. *Bioinformatics* 2008 December 15;24(24):2938-9.
- (7) Larson MG, Atwood LD, Benjamin EJ, Cupples LA, D'Agostino RB, Sr., Fox CS, Govindaraju DR, Guo CY, Heard-Costa NL, Hwang SJ, Murabito JM, Newton-Cheh C, O'Donnell CJ, Seshadri S, Vasan RS, Wang TJ, Wolf PA, Levy D. Framingham Heart Study 100K project: genome-wide associations for cardiovascular disease outcomes. *BMC Med Genet* 2007;8 Suppl 1:S5.
